# Supplementary material
Source: PubMed Central journal article supplement (PMC2678959)
Supplement: NIHMS90873-supplement-2.pdf [file NIHMS90873-supplement-2.pdf]

## Online material

### Supplemental data (online only)

**Table A.** Results of genotypic association test for the SNP significantly associated with CVL for the extended case-control cohort assuming different genetic models: <sup>1</sup>general, <sup>2</sup>recessive, <sup>3</sup>codominant, and <sup>4</sup>dominant. \*  $p$ -value < 0.05; \*\*  $p$ -value < 0.01. <sup>5</sup>Risk genotype corresponds to the genotype positively associated with cases. We have applied a Fisher exact test for the analysis of the SNP of the promoter (A180G and G318A). + Haldane correction applied.

| SNP    | Risk genotype <sup>5</sup> | Odds ratio         | 95% CI                   | $p$ -value |
|--------|----------------------------|--------------------|--------------------------|------------|
| A180G  | GG <sup>1</sup>            | –                  | –                        | 0.082      |
|        | GG <sup>2</sup>            | 3.70 <sup>+</sup>  | 0.15–92.31 <sup>+</sup>  | 0.451      |
|        | AG <sup>3</sup>            | 8.90               | 0.45–175.60              | 0.089      |
|        | AG + GG <sup>4</sup>       | 11.63 <sup>+</sup> | 0.61–220.22 <sup>+</sup> | 0.039*     |
| G318A  | AA                         | –                  | –                        | 0.082      |
|        | AA                         | 6.26 <sup>+</sup>  | 0.30–132.75 <sup>+</sup> | 0.202      |
|        | AG                         | 6.26 <sup>+</sup>  | 0.30–132.75 <sup>+</sup> | 0.202      |
|        | AA + AG                    | 11.63 <sup>+</sup> | 0.61–220.22 <sup>+</sup> | 0.039*     |
| A4549G | GG                         | –                  | –                        | 0.140      |
|        | GG                         | 1.83               | 1.02–3.30                | 0.042*     |
|        | AA + GG                    | 1.03               | 0.44–2.40                | 0.944      |
|        | AG + GG                    | 1.57               | 0.76–3.26                | 0.262      |
| C4859T | TT                         | –                  | –                        | 0.006**    |
| C4859T | TT                         | –                  | –                        | 0.006**    |
|        | TT                         | 14.45 <sup>+</sup> | 0.76–273.68 <sup>+</sup> | 0.013*     |
|        | CT                         | 2.18               | 0.93–5.08                | 0.067      |
|        | CT + TT                    | 3.04               | 1.34–6.91                | 0.006**    |
